# Supplementary material for: Understanding model spread in sea ice volume by attribution of model differences in seasonal ice growth and melt
Source: Copernicus journal article supplement (doi:10.5194/tc-16-4013-2022), 2022-10-07
Supplement: Supplementary file 1 [file tc-16-4013-2022-supplement.pdf]

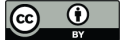

*Supplement of*

## **Understanding model spread in sea ice volume by attribution of model differences in seasonal ice growth and melt**

**Alex West et al.**

*Correspondence to:* Alex E. West ([alex.west@metoffice.gov.uk](mailto:alex.west@metoffice.gov.uk))

The copyright of individual parts of the supplement might differ from the article licence.

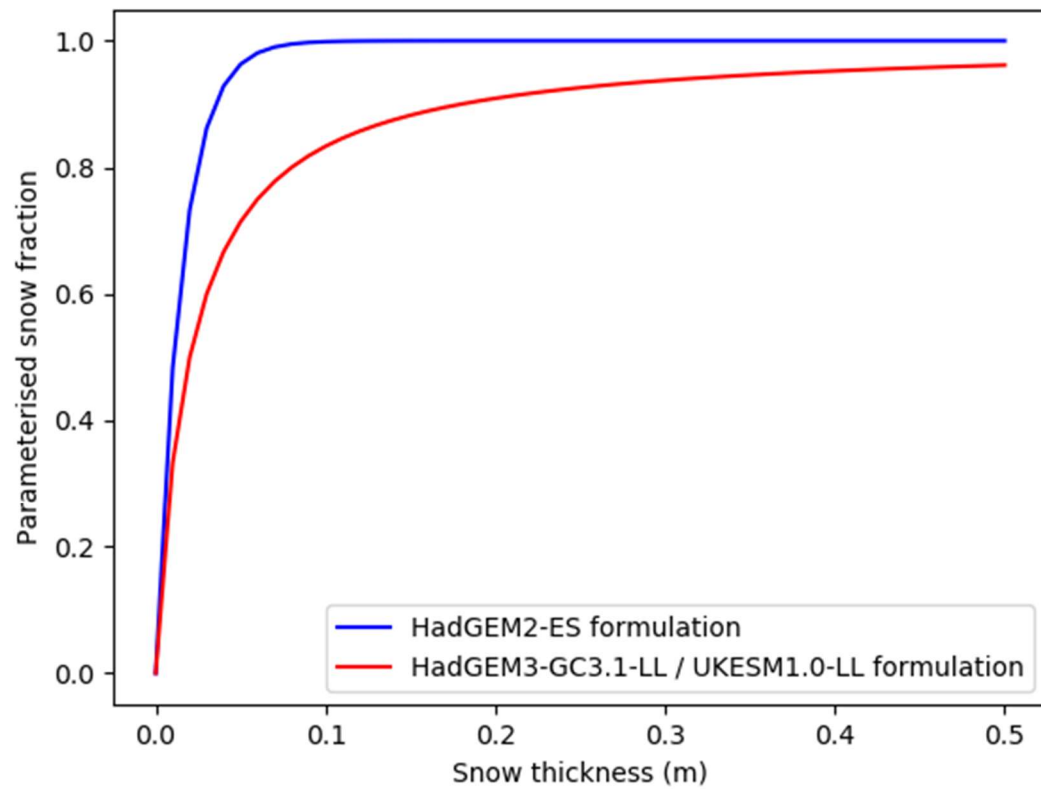

Figure S1. Snow area as a function of snow thickness in the HadGEM2-ES formulation (blue) and the HadGEM3-GC3.1-LL and UKESM1.0-LL formulations (red).
